# Supplementary material for: Shelf-Life Stability of Ready-to-Use Green Rooibos Iced Tea Powder—Assessment of Physical, Chemical, and Sensory Properties
Source: MDPI journal article supplement (doi:10.3390/molecules26175260), 2021-08-30
Supplement: s1 [file s1]

# SUPPLEMENTARY MATERIAL

## Shelf-life Stability of Ready-To-Use Green Rooibos Iced Tea Powder – Assessment of Physical, Chemical and Sensory Properties

Chantelle Human<sup>1,\*</sup>, Dalene de Beer<sup>1,2</sup>, Magdalena Muller<sup>2</sup>, Marieta van Der Rijst<sup>3</sup>, Marique Aucamp<sup>4</sup>, Andreas Tredoux<sup>5</sup>, André de Villiers<sup>5</sup>, Elizabeth Joubert<sup>1,2</sup>

<sup>1</sup> Plant Bioactives Group, Post-Harvest and Agro-Processing Technologies, Agricultural Research Council (Infruitec-Nietvoorbij), Private Bag X5026, Stellenbosch 7599, South Africa; [HumanC@arc.agric.za](mailto:HumanC@arc.agric.za) (C.H.); [DBeerD@arc.agric.za](mailto:DBeerD@arc.agric.za) (D.d.B.); [JoubertL@arc.agric.za](mailto:JoubertL@arc.agric.za) (E.J.)

<sup>2</sup> Department of Food Science, Stellenbosch University, Private Bag X1, Matieland (Stellenbosch) 7600, South Africa; [mm7@sun.ac.za](mailto:mm7@sun.ac.za) (M.M.)

<sup>3</sup> Biometry Unit, Agricultural Research Council, Private Bag X5026, Stellenbosch 7599, South Africa; [VanDerRijstM@arc.agric.za](mailto:VanDerRijstM@arc.agric.za) (M.v.D.R.)

<sup>4</sup> School of Pharmacy, University of the Western Cape, Private Bag X17, Bellville 7535, South Africa; [maucamp@uwc.ac.za](mailto:maucamp@uwc.ac.za) (M.A.)

<sup>5</sup> Department of Chemistry and Polymer Science, Stellenbosch University, Private Bag X1, Matieland (Stellenbosch) 7600, South Africa; [atredoux@sun.ac.za](mailto:atredoux@sun.ac.za) (A.T.); [ajdevill@sun.ac.za](mailto:ajdevill@sun.ac.za) (A.d.V)

\* Correspondence: [HumanC@arc.agric.za](mailto:HumanC@arc.agric.za); Tel.: (021)-809-3416

**Table S1.** Nothofagin degradation (%) and average degradation rate constants (K) of the first order model<sup>1</sup> fitted to the experimental data representing nothofagin degradation in green rooibos extract powder and powder mixtures during storage at 30°C/65 % RH and 40°C/65 % RH for 12 months in glass vials and 5 months in semi-permeable sachets.

| Powder            | Sealed glass vials     |                          |                                            |                        |                          |                               | Semi-permeable sachets |                          |                               |                       |                          |                               |
|-------------------|------------------------|--------------------------|--------------------------------------------|------------------------|--------------------------|-------------------------------|------------------------|--------------------------|-------------------------------|-----------------------|--------------------------|-------------------------------|
|                   | 30°C/65% RH            |                          |                                            | 40°C/65% RH            |                          |                               | 30°C/65% RH            |                          |                               | 40°C/65% RH           |                          |                               |
|                   | % Decrease (12 months) | K (month <sup>-1</sup> ) | R <sup>2</sup> <sub>adj</sub> <sup>2</sup> | % Decrease (12 months) | K (month <sup>-1</sup> ) | R <sup>2</sup> <sub>adj</sub> | % Decrease (5 months)  | K (month <sup>-1</sup> ) | R <sup>2</sup> <sub>adj</sub> | % Decrease (5 months) | K (month <sup>-1</sup> ) | R <sup>2</sup> <sub>adj</sub> |
| GRE <sup>3</sup>  | 8.3±0.6 d <sup>4</sup> | 5                        | 5                                          | 20.2±1.9 d             | 0.020±0.002 e            | 0.9164                        | 5.3±1.4 e              | 5                        | 5                             | 17.3±2.2 f            | 0.035±0.003 f            | 0.8434                        |
| IN50 <sup>6</sup> | 10.2±0.9 d             | 5                        | 5                                          | 12.1±1.6 d             | 5                        | 5                             | 0.4±0.5 f              | 5                        | 5                             | 3.3±0.4 g             | 5                        | 5                             |
| M1 <sup>7</sup>   | 18.9±1.9 c             | 0.017±0.000 c            | 0.6901                                     | 48.9±1.2 c             | 0.069±0.002 d            | 0.9453                        | 24.1±2.1 c             | 0.047±0.013 bc           | 0.8171                        | 37.6±6.2 e            | 0.087±0.009 e            | 0.9026                        |
| M2 <sup>8</sup>   | 36.0±3.3 b             | 0.038±0.002 b            | 0.8641                                     | 76.4±0.6 b             | 0.113±0.003 c            | 0.9816                        | 19.9±3.3 d             | 0.038±0.006 c            | 0.6979                        | 59.5±1.3 c            | 0.143±0.005 c            | 0.9484                        |
| M3 <sup>9</sup>   | 48.5±2.9 a             | 0.058±0.001 a            | 0.9095                                     | 88.1±0.6 b             | 0.145±0.002 b            | 0.9357                        | 29.1±3.0 b             | 0.059±0.005 b            | 0.7822                        | 47.7±3.3 d            | 0.114±0.005 d            | 0.8308                        |
| M4 <sup>10</sup>  | 35.7±3.5 b             | 0.041±0.005 b            | 0.7896                                     | 85.3±0.5 a             | 0.153±0.003 a            | 0.9786                        | 39.7±4.3 a             | 0.082±0.009 a            | 0.9327                        | 80.2±2.2 a            | 0.269±0.008 a            | 0.9560                        |
| M5 <sup>11</sup>  | 33.7±3.3 b             | 0.035±0.003 b            | 0.8754                                     | 90.7±0.7 a             | 0.156±0.002 a            | 0.9802                        | 40.8±2.1 a             | 0.083±0.007 a            | 0.8619                        | 66.0±1.9 b            | 0.174±0.007 b            | 0.9300                        |

<sup>1</sup> First order model:  $C = C_0 \exp(-Kt)$ , where  $C$  is aspalathin (g/100 g extract, d.b.),  $C_0$  is initial aspalathin (g/100 g extract, d.b.),  $t$  is the time in months and  $K$  is the reaction rate constant.

<sup>2</sup> Adjusted correlation of coefficient.

<sup>3</sup> Green rooibos extract.

<sup>4</sup> Means in the same column with the same letter are not significantly different ( $p \geq 0.05$ ).

<sup>5</sup> Less than 10% change in aspalathin content observed – not suitable for kinetic modelling.

<sup>6</sup> GRE microencapsulated with inulin in 1:1 (m/m) ratio.

<sup>7</sup> Mixture 1 (IN50 and sucrose).

<sup>8</sup> Mixture 2 (IN50 and xylitol).

<sup>9</sup> Mixture 3 (IN50, xylitol and citric acid).

<sup>10</sup> Mixture 4 (IN50, xylitol and ascorbic acid).

<sup>11</sup> Mixture 5 (IN50, xylitol, citric acid and ascorbic acid).

**Table S2.** Sensory attributes used during descriptive analysis of reconstituted M3<sup>1</sup> before and after storage for 1 month at 30°C/65% RH and 40°C/65% RH in sealed glass vials and semi-permeable sachets.

| Attributes                 | Descriptions                                                                           |
|----------------------------|----------------------------------------------------------------------------------------|
| Rooibos-woody aroma        | Aromatics associated with dry bushes, stems and twigs of fermented rooibos herbal tea  |
| Apple aroma                | Sweet aromatics associated with apple pie or cooked apples                             |
| Fruity-sweet aroma         | Aromatics associated with sweet/sour smell of non-specific fruit                       |
| Honey aroma                | Aromatics associated with fragrance of fynbos honey or <i>Alyssum</i> flowers          |
| Hay/dried grass aroma      | Slightly sweet aroma associated with dried grass or hay                                |
| Grainy aroma               | Aroma of grains, porridge or dog pellets                                               |
| Seaweed aroma              | Aromatics associated with seaweed lying in the sun, fishy aroma/flavour of omega-3 oil |
| Rubber/putty-like aroma    | Aromatics associated with Band-Aid®, rubber or putty                                   |
| Dusty aroma                | Earthy aromatics associated with dry dirt roads                                        |
| Sweet taste                | Fundamental taste of sucrose                                                           |
| Sour taste                 | Fundamental taste of citric acid                                                       |
| Bitter taste               | Fundamental taste of caffeine                                                          |
| Astringent mouthfeel       | Dry puckering feeling/sensation on the tongue and other mouth surfaces                 |
| Synthetic sweet aftertaste | A lingering, synthetic sweet taste                                                     |

<sup>1</sup> Contains green rooibos extract microencapsulated with inulin in a 1:1 ratio (m/m), xylitol and citric acid.

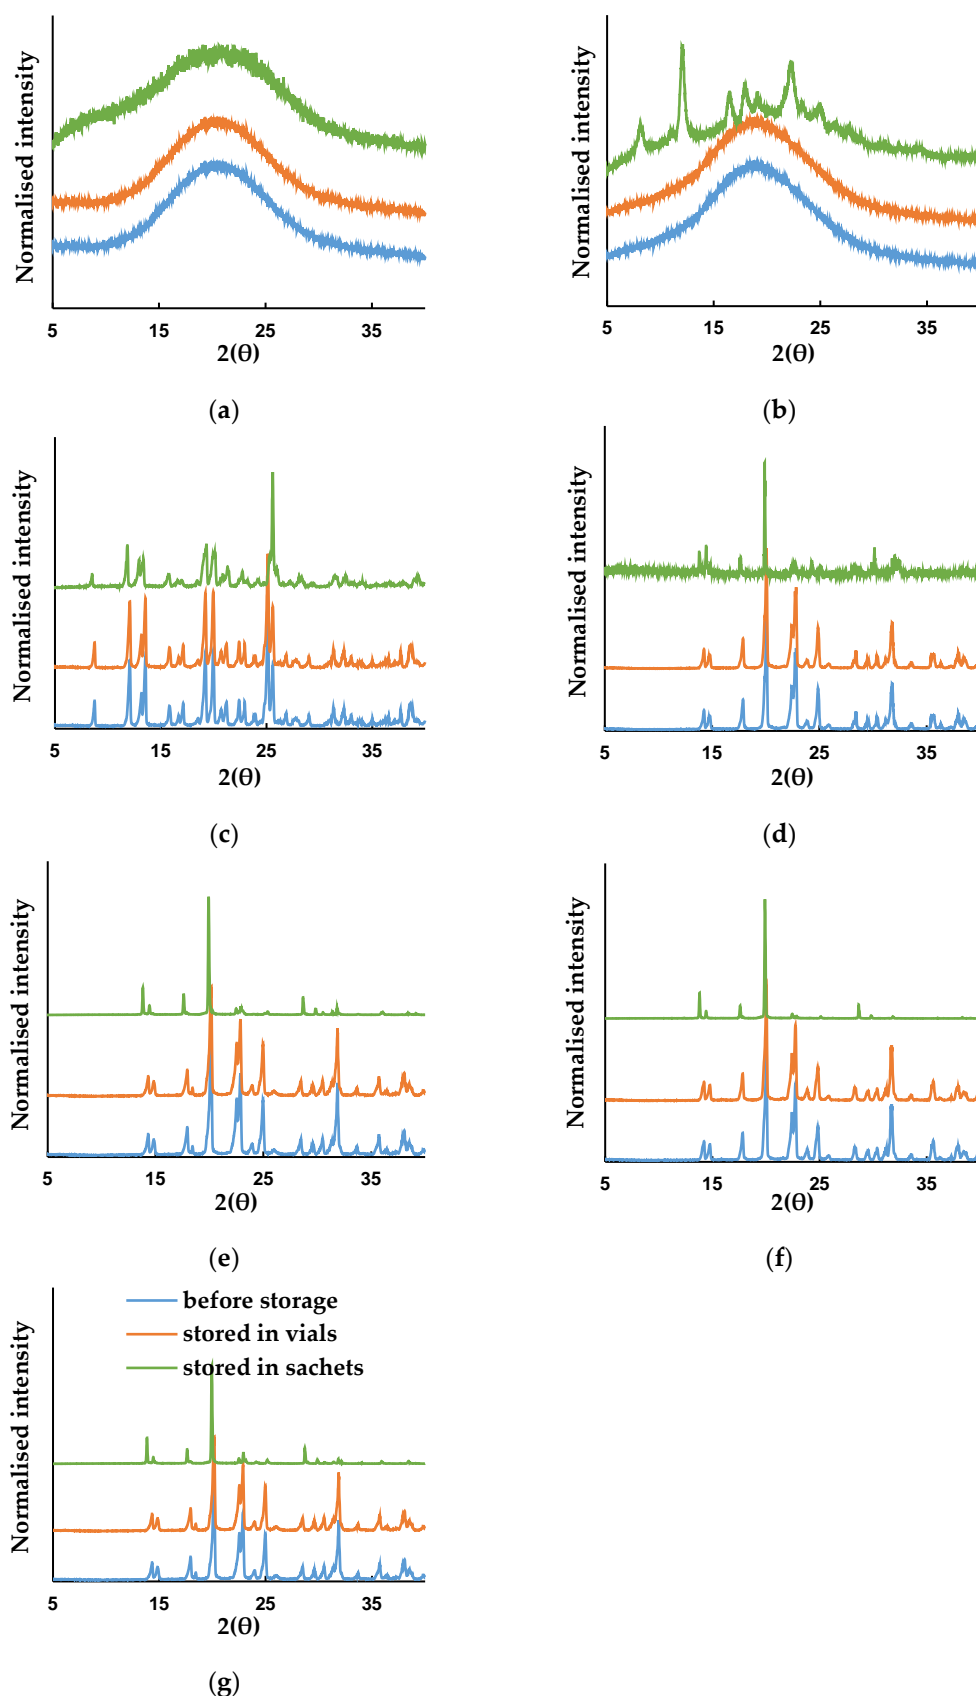

**Figure S1.** X-ray powder diffractograms of green rooibos extract powder and powder mixtures: (a) green rooibos extract (GRE), (b) GRE microencapsulated with inulin in 1:1 ratio (m/m) (IN50), (c) M1 (IN50 and sucrose), (d) M2 (IN50 and xylitol), (e) M3 (IN50, xylitol and citric acid), (f) M4 (IN50, xylitol and ascorbic acid) and (g) M5 (IN50, xylitol, ascorbic and citric acid), before storage and after storage at 40 °C/65% RH for 12 months in glass vials and 5 months in semi-permeable sachets.

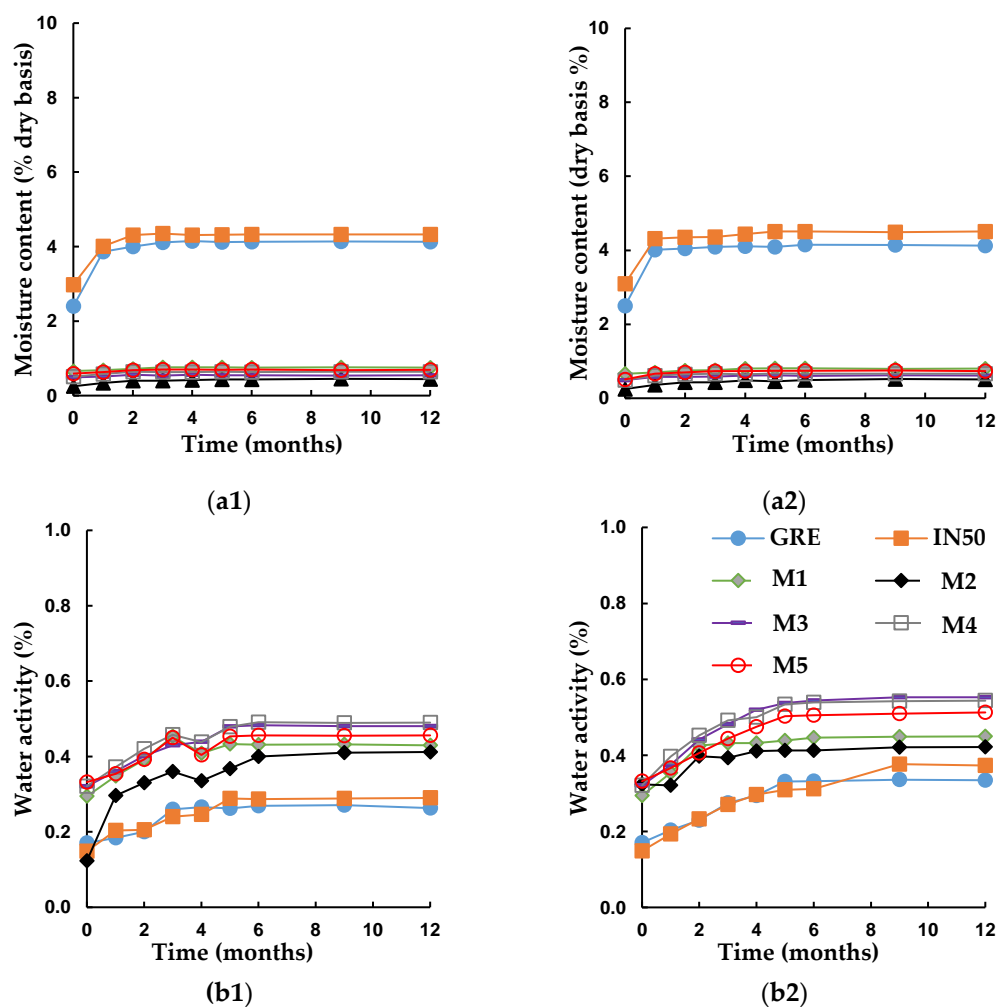

**Figure S2.** Moisture content (a) and water activity (b) of green rooibos powders: green rooibos extract (GRE), GRE microencapsulated with inulin in 1:1 ratio (m/m) (IN50), M1 (IN50 and sucrose), M2 (IN50 and xylitol), M3 (IN50, xylitol and citric acid), M4 (IN50, xylitol and ascorbic acid) and M5 (IN50, xylitol, ascorbic acid and citric acid) throughout storage at (1) 30°C/65% RH and (2) 40°C/65% RH for 12 months in sealed glass vials.

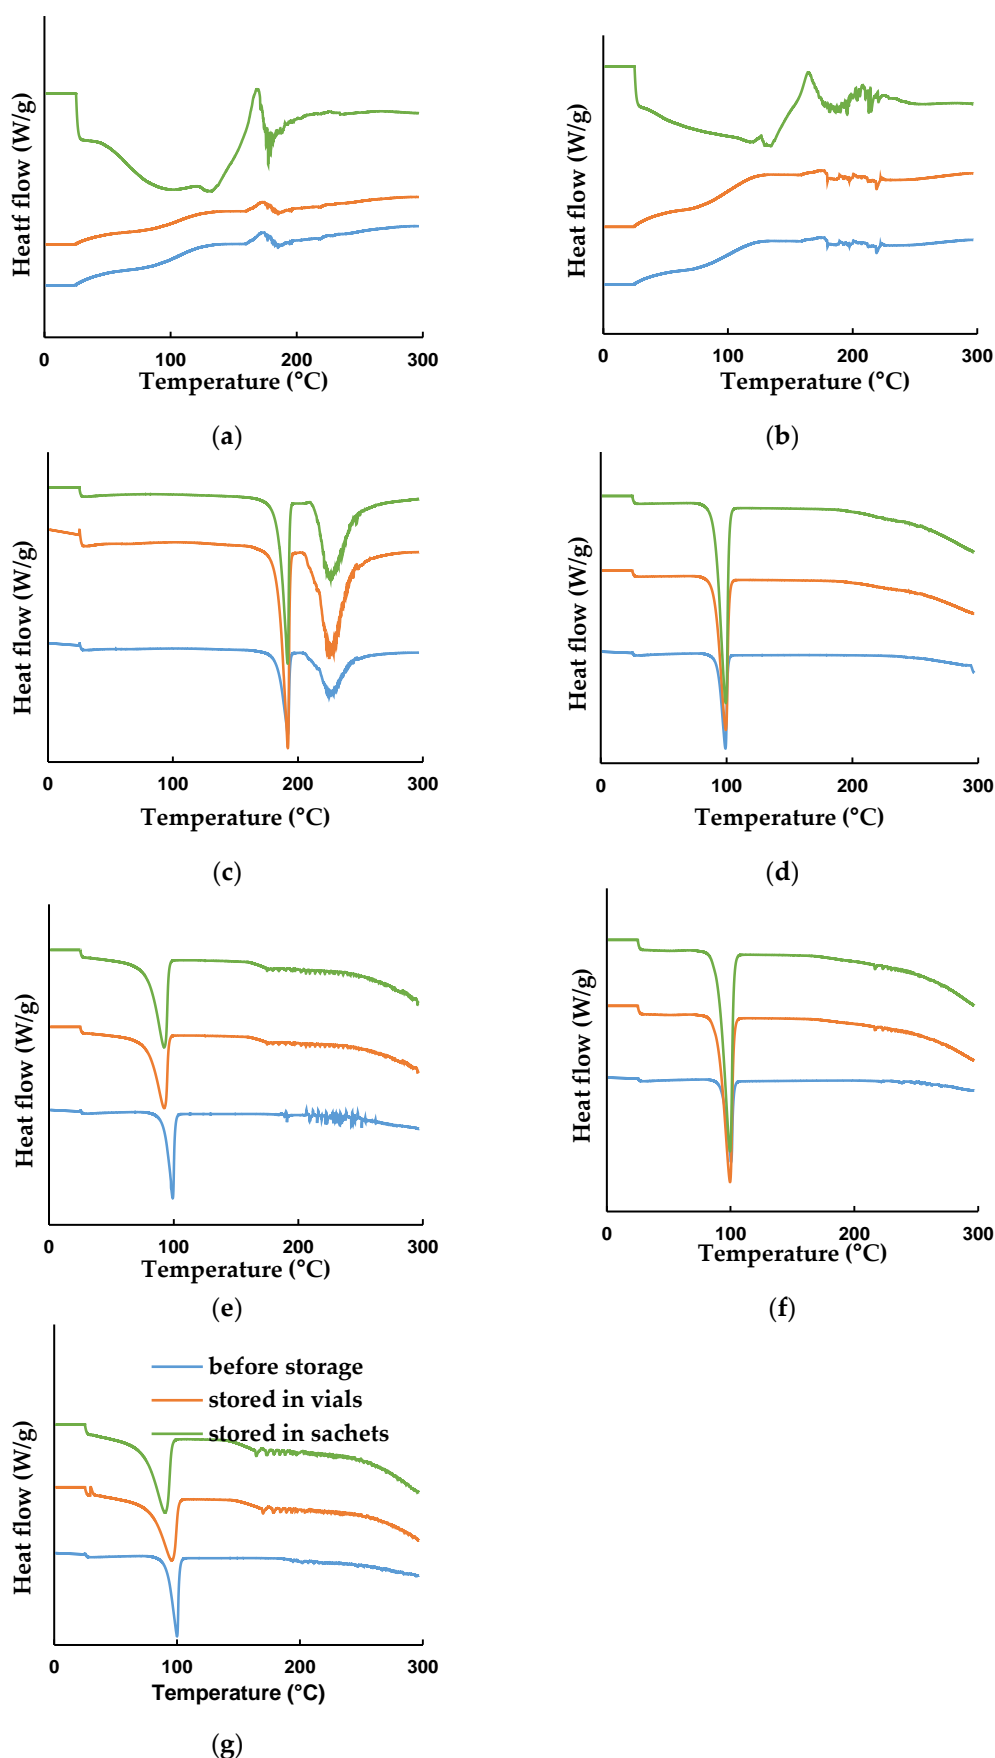

**Figure S3.** Differential scanning calorimetry thermograms of green rooibos extract powder and powder mixtures: (a) green rooibos extract (GRE), (b) GRE microencapsulated with inulin in 1:1 ratio (m/m) (IN50), (c) M1 (IN50 and sucrose), (d) M2 (IN50 and xylitol), (e) M3 (IN50, xylitol and citric acid), (f) M4 (IN50, xylitol and ascorbic acid) and (g) M5 (IN50, xylitol, ascorbic and citric acid), before storage and after storage at 40°C/65% RH for 12 months in glass vials and 5 months in semi-permeable sachets.
